# Supplementary material
Source: Royal Society of Chemistry journal article supplement (doi:10.1039/d6mh00621c)
Supplement: d6mh00621c1.pdf [file d6mh00621c1.pdf]

1 **Supplementary Information**

2

3

4 **Leukocyte-Inspired Multiscale Hierarchical Interface for High-Efficiency Capture and**  
5 **Gentle Release of Circulating Tumor Cells**

6

7 *Yujie Lv<sup>a,#</sup>, Jin Yang<sup>a,#</sup>, Ronghua Wang<sup>a</sup>, Jianwen Hou<sup>b</sup>, Xinhao Peng<sup>c,\*</sup>, Xia Liu<sup>a,\*</sup>, Shuxun*  
8 *Cui<sup>d,\*</sup>*

9 <sup>a</sup> School of Chemistry, Southwest Jiaotong University, Chengdu, 610031, China

10 <sup>b</sup> Institute of Biomedical Engineering, College of Medicine, Southwest Jiaotong University,  
11 Chengdu, 610031, China

12 <sup>c</sup> Department of Oncology, Affiliated Hospital of Southwest Jiaotong University, The Third  
13 People's Hospital of Chengdu, Chengdu, 610031, China

14 <sup>d</sup> Department of Chemistry, College of Sciences, Northeastern University, Shenyang, 110819,  
15 China

16

17

18 **Additional Experimental Section**

19 **Additional Scheme S1**

20 **Additional Figures S1-S11**

21 **Additional Tables S1-S3**

22 **Additional References**

23

## 1 **1. Additional Experimental Section**

### 2 **1.1 Synthesis of tetra-ortho-methoxy-substituted azobenzene (mAzo)**

3 mAzo was successfully synthesized according to the literature.<sup>1</sup> Briefly, as in Figure S3a,  
4 2,6-dimethoxyaniline (1.54 g, 10 mmol) was dissolved in dilute hydrochloric acid (4.32 mL,  
5 21%) and cooled to 0 - 5°C in an ice bath. NaNO<sub>2</sub> (0.69 g, 10 mmol) dissolved in 6.67 mL of  
6 H<sub>2</sub>O was slowly added to the above solution and stirred for 20 min with the temperature always  
7 maintained at 0 - 5°C. The above diazonium salt was then slowly added to a 20 mL suspension  
8 of an ice-water mixture mixed with 3, 5-dimethoxyaniline (1.54 g, 10 mmol), and the pH of the  
9 mixture was adjusted to 8 - 9 with saturated sodium bicarbonate solution and stirred overnight.  
10 Finally, the red crude product was filtered and purified by chromatography using  
11 methanol/ethyl acetate (1:4) as eluent to obtain the final product mAzo.

### 12 **1.2 Preparation of SoS silica microspheres**

13 SoS silica microspheres were synthesized with minor modifications based on previously  
14 reported methods.<sup>2</sup> First, PVA (0.25 g) was dissolved in water (5 mL) by ultrasonication, while  
15 CTAB (0.10 g) was added later under magnetic stirring. Then methanol (8 mL) and ammonium  
16 hydroxide (2 mL, 1.4%) were sequentially added to the above solution. After magnetic stirring  
17 for 15 min, CPTMS (500 μL) was added drop by drop, and then stirred at room temperature for  
18 24 h. The white solid product was collected by centrifugation at 11,000 rpm and washed with  
19 ethanol, and then dried in a vacuum to obtain SoS silica microspheres.

### 20 **1.3 Calculation of specific surface area of SoS silica microsphere**

21 D and d were used to represent the particle sizes of large and small spheres in SoS silica  
22 microspheres, respectively. In the case of the large particle size ratio of the large sphere to the  
23 small sphere, the effect of the curved surface of the large sphere on the spatial alignment of  
24 small spheres was neglected. In the case of aligned small spheres, the number of small spheres  
25 ( $Q_{small}$ ) was calculated from the ratio of the surface area of the large sphere ( $S_{large}$ ) to the cross-  
26 sectional area of the small spherical hemisphere ( $A$ ):

$$Q_{small} = \frac{S_{large}}{A} = \frac{4\pi\left(\frac{D}{2}\right)^2}{\pi\left(\frac{d}{2}\right)^2} \quad (S1)$$

27  
28 The specific surface area of SoS silica microsphere ( $S_{V(SoS)}$ ) was calculated from the ratio of  
29 the surface area of all the small spherical hemispheres ( $S_{small}$ ) to the volume of the whole SoS  
30 silica microsphere ( $V_{SoS}$ ):

$$S_{V(\text{SoS})} = \frac{S_{\text{small}}}{V_{\text{SoS}}} = \frac{\frac{4\pi\left(\frac{d}{2}\right)^2}{2}Q_{\text{small}}}{\frac{4}{3}\pi\left(\frac{D}{2}\right)^3 + \frac{4}{2}\pi\left(\frac{d}{2}\right)^3Q_{\text{small}}} \quad (\text{S2})$$

1

2 The specific surface area of smooth silica microsphere ( $S_{V(\text{large})}$ ) was calculated by the ratio  
 3 of the surface area of the large sphere ( $S_{\text{large}}$ ) to its volume ( $V_{\text{large}}$ ):

$$S_{V(\text{large})} = \frac{S_{\text{large}}}{V_{\text{large}}} = \frac{4\pi\left(\frac{D}{2}\right)^2}{\frac{4}{3}\pi\left(\frac{D}{2}\right)^3} \quad (\text{S3})$$

4

5 Based on the aforementioned calculations, it can be inferred that the specific surface area of  
 6 the SoS silica microspheres is approximately twice that of the smooth silica microspheres.

#### 7 **1.4 Cell culture and blood samples processing**

8 In our experiments, MCF-7, HeLa and HepG2 cells were selected as model target cells, and  
 9 all were cultured at 37°C in a 5% CO<sub>2</sub> environment, with HepG2 using minimum essential  
 10 medium (MEM) (supplemented with 10% FBS and 1% antibiotics), and the other cells were  
 11 cultured in Dulbecco's modified Eagle's medium (DMEM) (supplemented with 10% FBS and  
 12 1% antibiotics). Human whole blood samples were provided by the Third People's Hospital of  
 13 Sichuan Province (blood collection was performed according to the guidelines issued by the  
 14 Ethics Committee of the Academy of Medical Sciences and the Third People's Hospital of  
 15 Sichuan Province). Whole blood samples were then treated with ACK lysis buffer according to  
 16 the instructions of the manufacturer.

#### 17 **1.5 Cytocompatibility testing**

18 Cell viability was comprehensively evaluated by Calcein-AM/PI staining method and CCK-8  
 19 assay. Three different types of cancer cells were inoculated into 24-well plates at a density of  
 20  $1 \times 10^5$  cells per mL and incubated until their complete adherence and spreading, and then co-  
 21 incubated with different substrates. After 24 h, the samples were stained with Calcein-AM and  
 22 PI. Cells staining positively for Calcein-AM or PI were considered as alive or dead,  
 23 respectively. The procedure described for the co-incubation of cells with the material was  
 24 repeated. After 24 h, the samples were assayed according to the instructions for use of the CCK-  
 25 8 kit, and the absorbance of the solution at 450 nm was measured by a microplate reader.

#### 26 **1.6 Cancer cell capture assay**

27 In order to validate the effect of g@SoS-PACF nanosubstrate on the capture of cancer cells,  
 28 we investigated the capture efficiency of g@SoS, g@SoS-P, and g@SoS-PACF nanosubstrates

1 toward cancer cells, as well as the affinity toward cells of the two-dimensional cell capture  
 2 interface of g-NH<sub>2</sub>-FA and the three-dimensional nanosubstrate of g@SoS-PACF. The effect  
 3 of incubation time of cell capture on capture efficiency was explored by incubating 1×10<sup>5</sup> HeLa  
 4 cells with g@SoS, g@SoS-P, and g@SoS-PACF nanosubstrates in a shaker for different times  
 5 (5 - 120 min) at 37°C, aspirating the supernatant and gently rinsing three times with PBS to  
 6 remove uncaptured cells, and counting them by a cell counter. The capture efficiency was  
 7 calculated according to the following formula:

$$8 \text{ Capture efficiency} = \frac{\text{Total number of cells added} - \text{Number of uncaptured cells}}{\text{Total number of cells added}} \times 100\% \quad (S4)$$

9 Finally, g@SoS-PACF nanosubstrate was incubated with EpCAM-positive cells (MCF-7,  
 10 HepG2) for 60 min to demonstrate its broad-spectrum capture performance.

### 11 **1.7 Determination of binding constants for various substrates in interaction with cancer** 12 **cells**

13 To evaluate the binding performance of g-NH<sub>2</sub>-FA and g@SoS-PACF toward target cells,  
 14 HeLa cells were pre-stained with DAPI. The cells were incubated with g-NH<sub>2</sub>-FA and g@SoS-  
 15 PACF substrates immobilized with varying concentrations of FA following the capture protocol  
 16 described above, followed by three washes with PBS. The fluorescence intensity of pre-stained  
 17 HeLa cells in the supernatant was measured using a microplate reader,  $\lambda_{ex}/\lambda_{em} = 360 \text{ nm}/460 \text{ nm}$ .  
 18 The fluorescence from the captured cells was estimated by subtraction. The fluorescence  
 19 intensity ( $Y$ ) was normalized and fitted to the folate concentration ( $X$ ) to obtain  $K_d$  values  
 20 according to the following equation:

$$21 \quad Y = B_{max}X/(K_d + X) \quad (S5)$$

### 22 **1.8 Rare-cell capture performance of the g@SoS-PACF substrate**

23 To study the capture of rare cells, synthetic samples were prepared by adding different  
 24 numbers of HeLa cells (10 - 300 cells) into 1 mL of PBS. Similarly, artificial samples were  
 25 prepared by admixing different numbers of HeLa cells (10 - 300 cells) into 1 mL of treated  
 26 healthy blood. The rare-cell capture performance of the g@SoS-PACF substrate was evaluated  
 27 following the capture procedure described above.

### 28 **1.9 Release of captured cells and analysis of cell viability**

29 The captured cells were irradiated under LED red light source (620 nm) system for different  
 30 times (5 - 30 min), the supernatant was aspirated and gently moistened three times with PBS,  
 31 and the number of released cells was counted with a cell counter. Release efficiency

$$32 = \frac{\text{Number of released cells in the supernatant}}{\text{Number of captured cells}} \times 100\%. \text{ Cell viability was detected by live/dead}$$

33 staining method. The released cells were added to the well plates and incubated in high sugar

1 DMEM for 6, 24 and 48 h, respectively. The supernatant was then removed and after washing  
2 with PBS buffer, Calcein-AM/PI double staining was used to evaluate the viability according  
3 to the instructions of manufacturer. Cells labeled with Calcein-AM only were counted as viable.  
4 In addition, the viability of released cells was evaluated by CCK-8 assay after incubation with  
5 high sugar DMEM for 6, 24 and 48 h. The released cells were incubated for 48 h and transferred  
6 to a new well plate for further incubation and passaged when the cells spread on the bottom of  
7 the plate.

#### 8 **1.10 Cancer cell release purity assay**

9 WBCs and HeLa cells were mixed in PBS to prepare simulated blood samples, which were  
10 released by red light irradiation after co-incubation with g@SoS-PACF. Then the released cells  
11 were stained, and the number of released CTCs and WBCs was observed under a fluorescence  
12 microscope to calculate the release purity. The release purity was defined as the ratio of the  
13 number of released cancer cells to the total number of released cells.

#### 14 **1.11 Detection of CTCs from clinical blood samples**

15 Peripheral blood samples from 15 tumor patients and 4 healthy volunteers were collected in  
16 anticoagulation tubes, treated with ACK lysis buffer within a short period of time, and incubated  
17 with g@SoS-PACF substrate for detection according to the above procedure. After washing,  
18 the cells were sequentially fixed with 2.5% glutaraldehyde for 1 h, permeabilized with 0.5%  
19 Triton X-100 solution for 10 min, and blocked with 1% BSA solution for 30 min and then  
20 stained with anti-CD45 ( $20 \mu\text{g mL}^{-1}$ ) and PanCK ( $20 \mu\text{g mL}^{-1}$ ) overnight at  $4^{\circ}\text{C}$  in the dark.  
21 Finally, they were stained with DAPI ( $5 \mu\text{g mL}^{-1}$ ) for 15 min and observed under a laser  
22 confocal microscope.

#### 23 **1.12 Ethical approval**

24 All experiments were performed in accordance with the tenets of the Declaration of Helsinki,  
25 and approved by the Institutional Animal Care and Use Committee of Southwest Jiaotong  
26 University (No. SWJTU-2503-045). Informed consents were obtained from the human  
27 participants of this study.

28

29

30

1 2. Additional Scheme

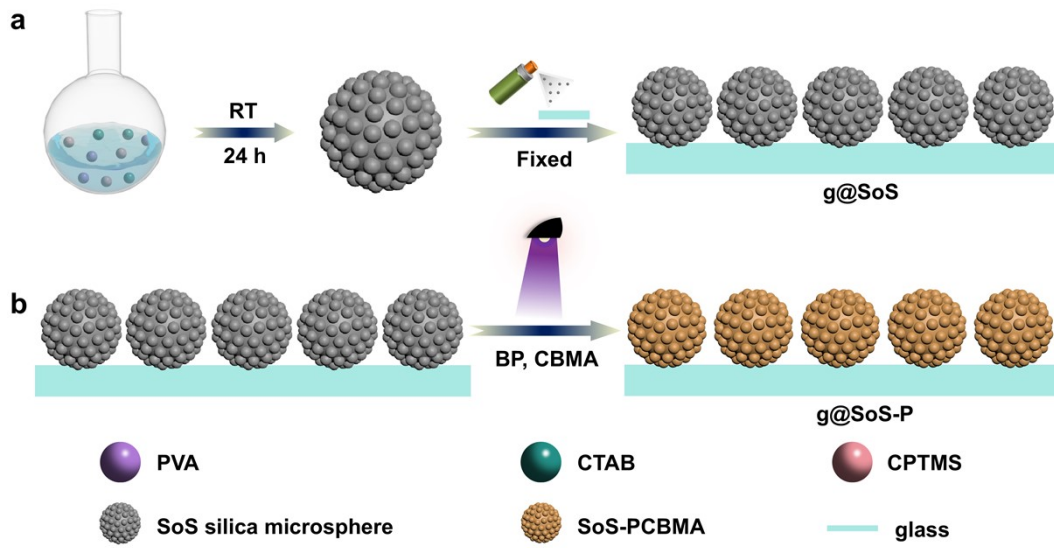

2

3 **Scheme S1.** Schematic illustration of the preparation process for g@SoS substrates (a) and

4 g@SoS-P substrates (b).

5

## 1 2. Additional Figures

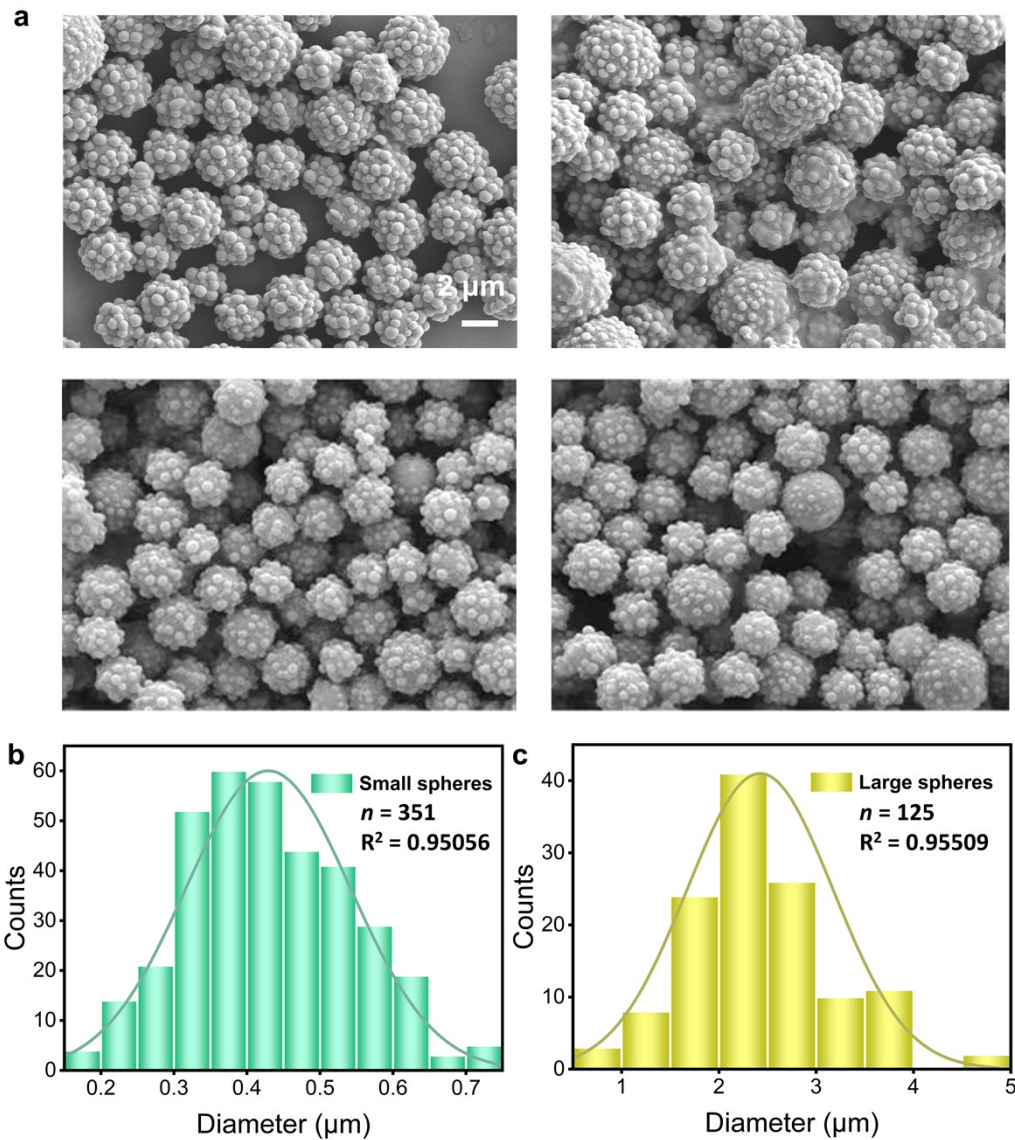

2

3 **Figure S1.** SEM images of SoS silica microspheres (a), and diameter distributions of small (b)

4 and large (c) spheres on SoS silica microspheres. The particle size distributions were

5 determined by measuring randomly selected microspheres/nanospheres from SEM images. The

6 sample size ( $n$ ) and coefficient of determination ( $R^2$ ) for the Gaussian fitting are indicated in

7 the corresponding panels: for small spheres,  $n = 351$  and  $R^2 = 0.95056$ ; for large spheres,  $n =$

8  $125$  and  $R^2 = 0.95509$ .

9

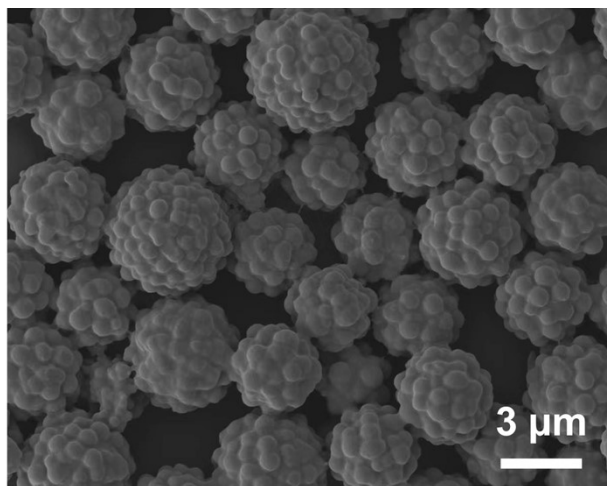

1

2 **Figure S2.** SEM image of the g@SoS-P substrate.

3

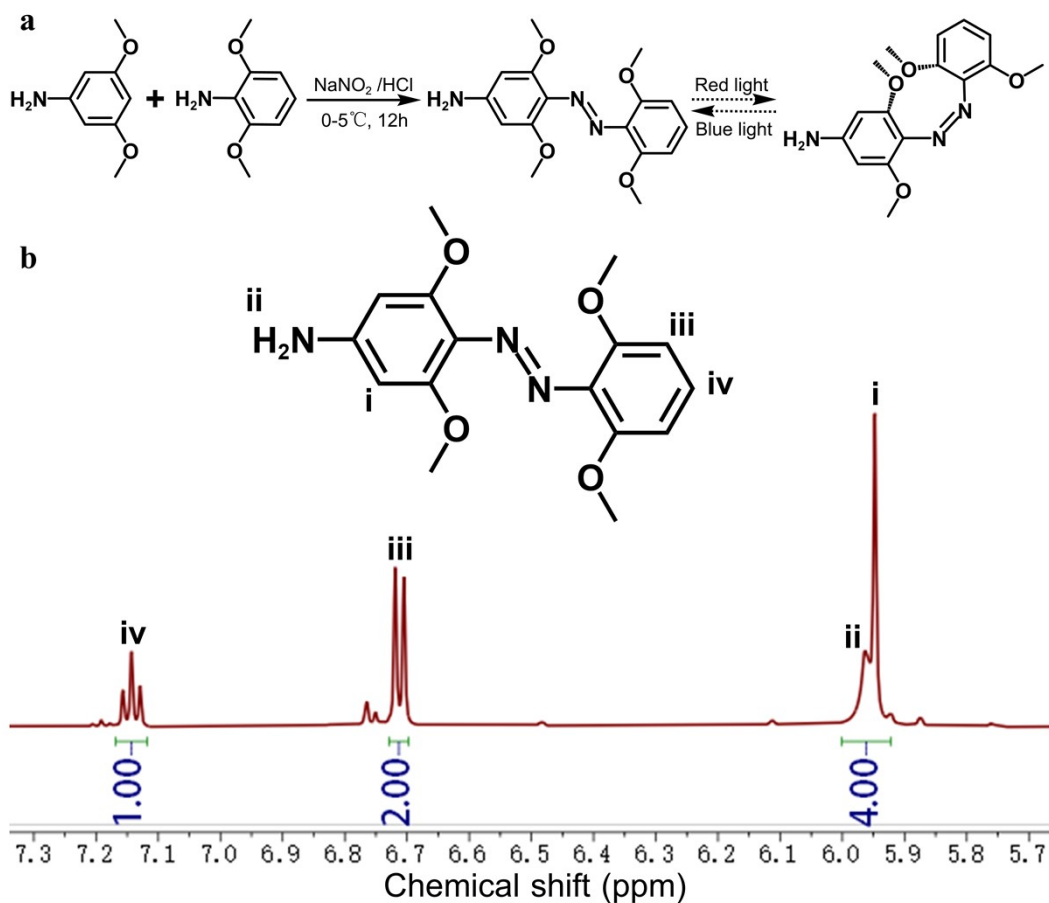

1

2 **Figure S3.** (a) The synthesis roadmap of mAzo. (b)  $^1\text{H-NMR}$  image of trans mAzo. The  
 3 chemical shift at i corresponds to i:  $\delta = 5.95$  (s, 2H; Ar-H) in trans mAzo, the chemical shift at  
 4 ii corresponds to ii:  $\delta = 5.96$  (s, 2H; Ar-NH<sub>2</sub>); the chemical shift at iii corresponds to iii:  $\delta =$   
 5 6.73 (d,  $J = 8.4$  Hz, 2H; Ar-H); the chemical shift at iv corresponds to iv:  $\delta = 7.14$  (t,  $J = 8.3$   
 6 Hz, 1H; Ar-H), demonstrating the synthesis of trans mAzo.

7

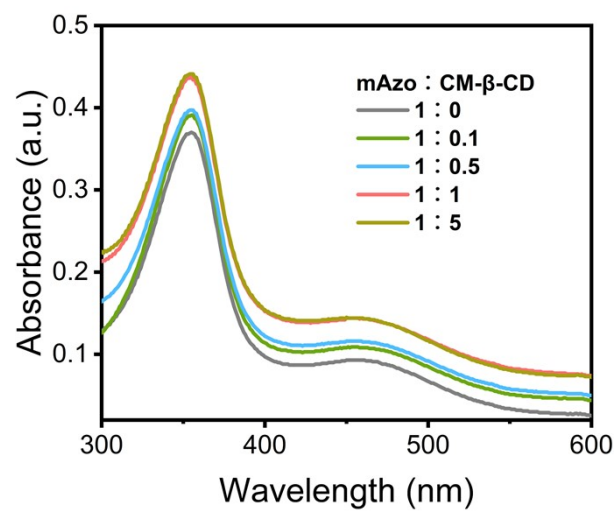

1  
2 **Figure S4.** UV-vis absorption spectra of mAzo bound to CM-β-CD.  
3

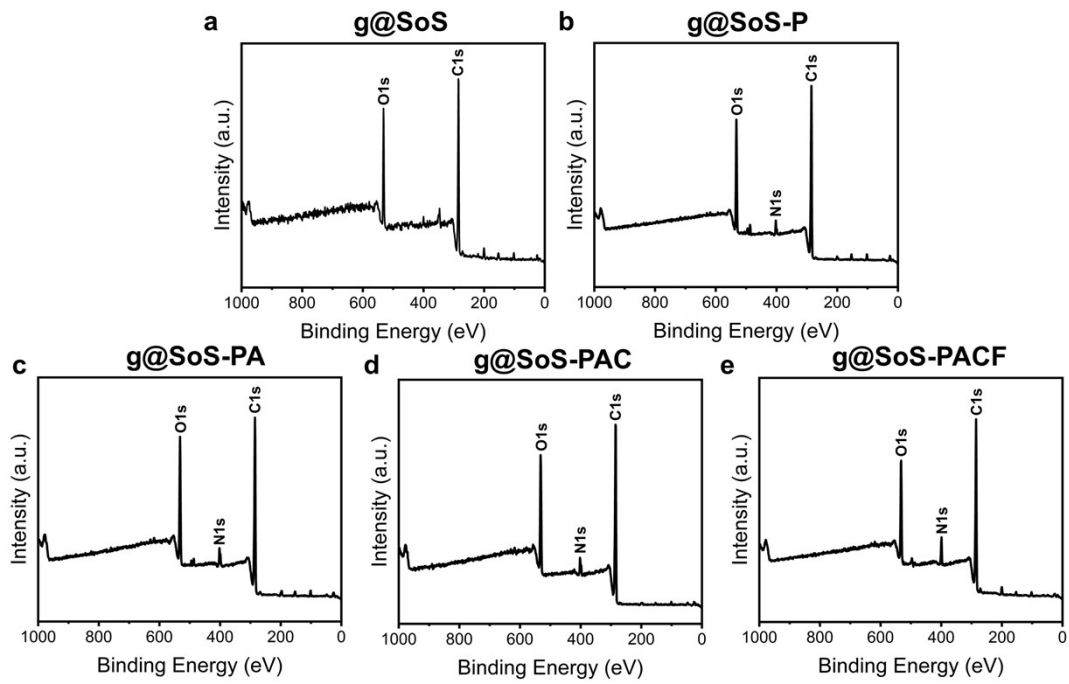

1  
 2 **Figure S5.** XPS spectra of the g@SoS (a), g@SoS-P(b), g@SoS-PA (c), g@SoS-PAC (d) and  
 3 g@SoS-PACF (e) substrates.

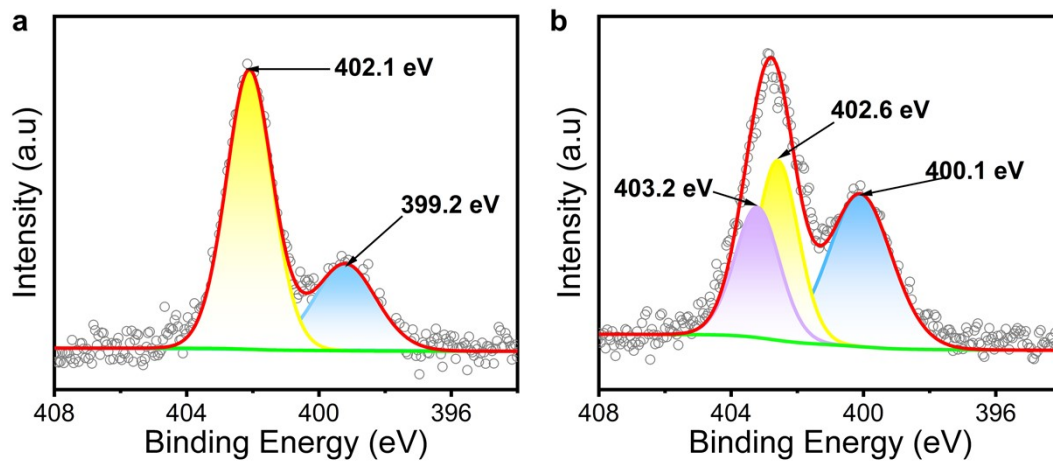

1  
 2 **Figure S6.** XPS high-resolution N 1s spectra of g@SoS-P (a) and g@SoS-PA (b) substrates.

3  
 4

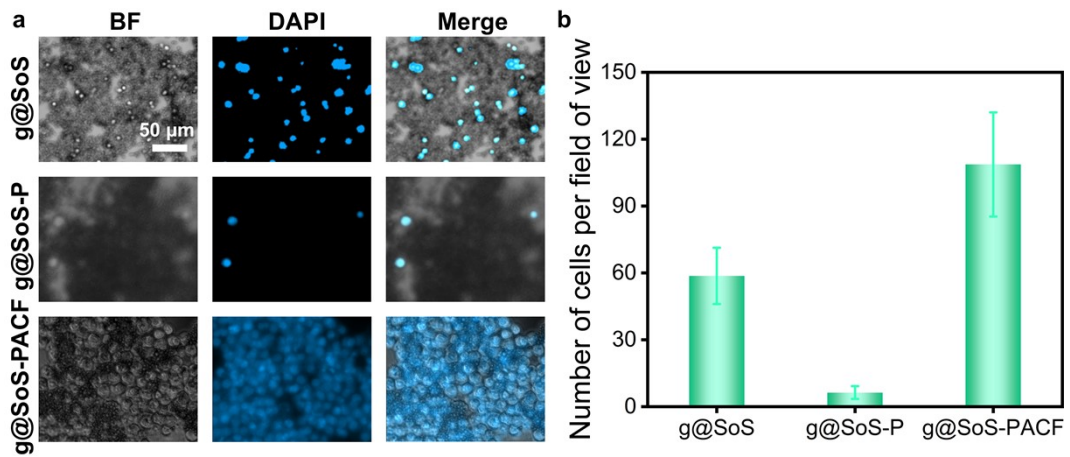

1  
 2 **Figure S7.** (a) Bright-field (BF) and fluorescence images and (b) corresponding quantification  
 3 of HeLa cells captured by g@SoS, g@SoS-P, and g@SoS-PACF substrates.

4  
 5

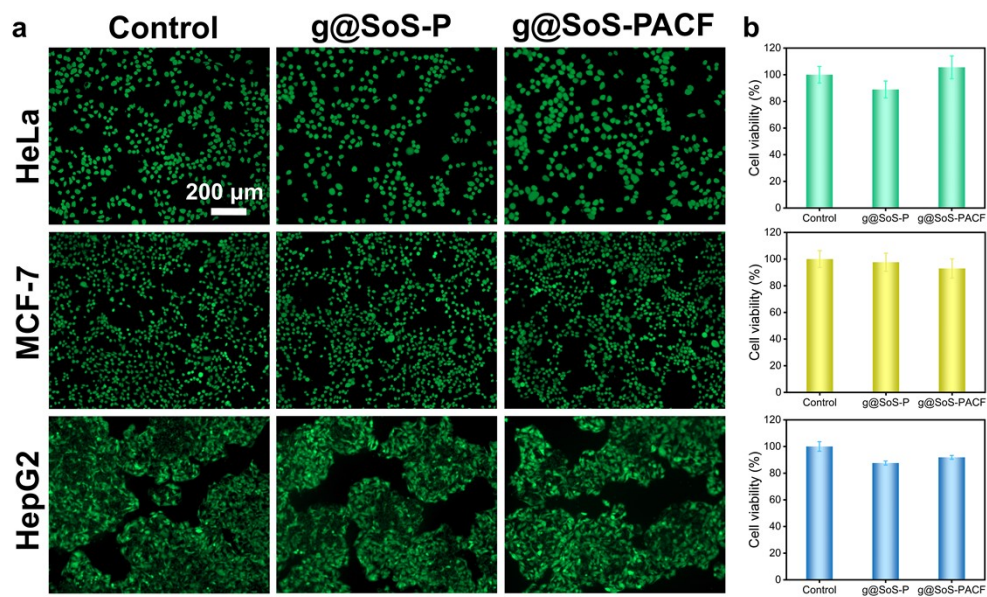

1  
 2 **Figure S8.** (a) The live/dead staining and (b) viability analysis of HeLa, MCF-7, and HepG2  
 3 cells following 24-hour incubation with different substrates.

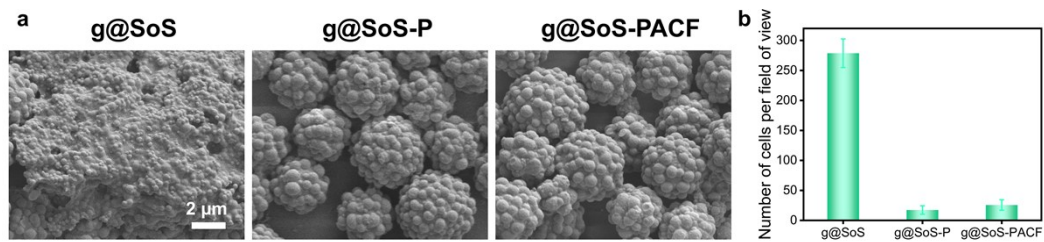

1  
 2 **Figure S9.** (a) SEM images and (b) corresponding quantitative analysis of platelet adhesion on  
 3 g@SoS, g@SoS-P, and g@SoS-PACF substrates.

4

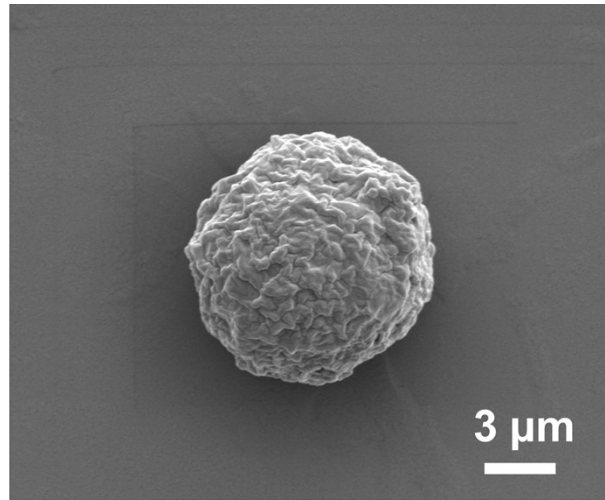

1  
2 **Figure S10.** SEM image of released HeLa cells.

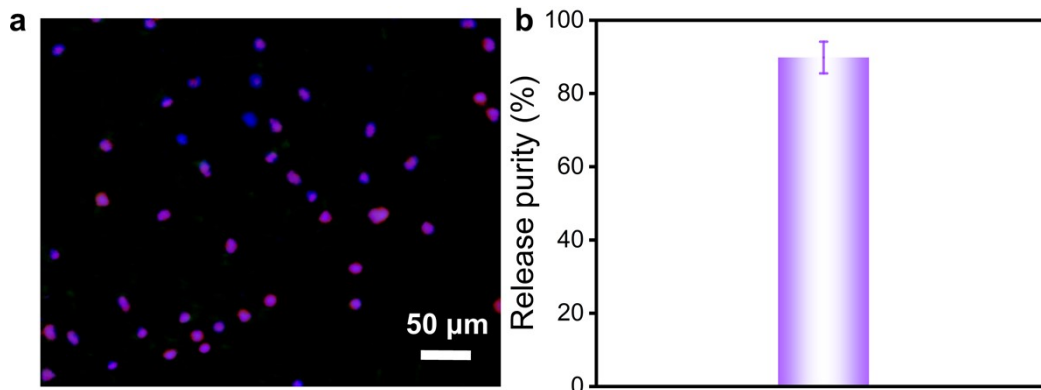

1  
2 **Figure S11.** (a) Immunofluorescence image of released CTCs and WBCs, and (b) the  
3 corresponding CTC purity.

1 **4. Additional Tables**

2 **Table S1.** Atomic content of various substrates obtained by XPS analysis.

| Sample     | Compositions (at. %) |       |       |
|------------|----------------------|-------|-------|
|            | C (%)                | O (%) | N (%) |
| g@SoS      | 72.5                 | 17.8  | 3.8   |
| g@SoS-P    | 72.3                 | 20.4  | 4.4   |
| g@SoS-PA   | 69.8                 | 20.8  | 6.2   |
| g@SoS-PAC  | 72.6                 | 20.3  | 5.6   |
| g@SoS-PACF | 71.1                 | 18.8  | 7.2   |

3  
4

1

**Table S2. Comparison of CTC Capture Methods**

| Platform                                   | Capture Efficiency | Release Efficiency | Cell Viability | Ref.      |
|--------------------------------------------|--------------------|--------------------|----------------|-----------|
| MagSweeper                                 | 62%                | N/A                | 51%            | 3         |
| Engineered nanobioprobes                   | 89%                | 65%                | 70%            | 4         |
| The cellsearch system                      | 85%                | N/A                | N/A            | 5         |
| Immuno-magnetic separation technique       | ~90%               | ~86%               | 81%            | 6         |
| Immuno-separation technique                | 87%                | 91%                | 86%            | 7         |
| Microfluidic device                        | >65%               | N/A                | 98.5%          | 8         |
| Microfluidic device                        | 50%                | N/A                | N/A            | 9         |
| Microfluidic device                        | 74%~94%            | N/A                | N/A            | 10        |
| Microfluidic device                        | 80%                | N/A                | N/A            | 11        |
| 3D micro/nanostructure microfluidic device | ~84%               | N/A                | N/A            | 12        |
| g@SoS-PACF                                 | 83.3%~92.7%        | >94%               | >89%           | This work |

2

1

**Table S3. Basic information of cancer patients and healthy donors.**

| Diagnosis               | Sample ID | Gender | Age | Clinical stage | Blood sample volume/mL | CTCs counts/mL |
|-------------------------|-----------|--------|-----|----------------|------------------------|----------------|
| nasopharyngeal          | 1         | male   | 58  | IV             | 1                      | 6              |
| laryngeal               | 2         | male   | 77  | IV             | 1                      | 16             |
| lung                    | 3         | male   | 56  | IV             | 1                      | 11             |
| oral                    | 4         | male   | 66  | IV             | 1                      | 5              |
| gastric                 | 5         | female | 78  | IV             | 1                      | 2              |
| colon                   | 6         | male   | 59  | III            | 1                      | 13             |
| intrahepatic cholangio  | 7         | male   | 56  | III            | 1                      | 2              |
| rectal                  | 8         | male   | 60  | IV             | 1                      | 4              |
| oropharyngeal           | 9         | male   | 76  | IV             | 1                      | 10             |
| malignant pleural tumor | 10        | male   | 18  | IV             | 1                      | 7              |
| esophageal              | 11        | male   | 49  | IV             | 1                      | 4              |
| cervical                | 12        | female | 58  | III(figo)      | 1                      | 2              |
| rectal                  | 13        | male   | 70  | III            | 1                      | 14             |
| liver neuroendocrine    | 14        | male   | 70  | IV             | 1                      | 3              |
| rectal                  | 15        | female | 72  | III            | 1                      | 8              |
| healthy donor           | 16        | female | 24  | N/A            | 1                      | 0              |
| healthy donor           | 17        | male   | 72  | N/A            | 1                      | 0              |
| healthy donor           | 18        | female | 55  | N/A            | 1                      | 0              |
| healthy donor           | 19        | male   | 25  | N/A            | 1                      | 0              |

2

3

## 1 5. Additional References

- 2 1 D. Wang, M. Wagner, H.-J. Butt and S. Wu, *Soft Matter*, 2015, **11**, 7656–7662.
- 3 2 A. Adham, R. Harald, M. Peter and Z. Haifei, *Adv Mater*, 2012, **24**, 6042–6048.
- 4 3 A. H. Talasaz, A. A. Powell, D. E. Huber, J. G. Berbee, K.-H. Roh, W. Yu, W. Xiao, M. M. Davis,  
5 R. F. Pease, M. N. Mindrinos, S. S. Jeffrey and R. W. Davis, *PNAS*, 2009, **106**, 3970–3975.
- 6 4 M. Xie, N.-N. Lu, S.-B. Cheng, X.-Y. Wang, M. Wang, S. Guo, C.-Y. Wen, J. Hu, D.-W. Pang and  
7 W.-H. Huang, *Anal Chem*, 2014, **86**, 4618–4626.
- 8 5 W. J. Allard, J. Matera, M. C. Miller, M. Repollet, M. C. Connelly, C. Rao, A. G. Tibbe, J. W.  
9 Uhr and L. W. Terstappen, *Clin Cancer Res*, 2004, **10**, 6897–6904.
- 10 6 S. Guo, H. Huang, X. Deng, Y. Chen, Z. Jiang, M. Xie, S. Liu, W. Huang, X. Zhou, *Nano Res.*,  
11 2018, **11**, 2592-2604.
- 12 7 Y. Xiao, L. Lin, M. Shen, X. Shi, *Bioconjugate chem.*, 2020, **31**, 130-138.
- 13 8 S. Nagrath, L. V. Sequist, S. Maheswaran, D. W. Bell, D. Irimia, L. Ulkus, M. R. Smith, E. L.  
14 Kwak, S. Digumarthy and A. Muzikansky, *Nature*, 2007, **450**, 1235–1239.
- 15 9 A. D. Hughes, J. Mattison, L. T. Western, J. D. Powderly, B. T. Greene and M. R. King, *Clin*  
16 *Chem*, 2012, **58**, 846–853.
- 17 10 Y. Zhou, Z. Dong, H. Andarge, W. Li and D. Pappas, *Analyst*, 2020, **145**, 257–267.
- 18 11 J. Yin, L. Mou, M. Yang, W. Zou, C. Du, W. Zhang and X. Jiang, *Anal Chim Acta*, 2019, **1060**,  
19 133–141.
- 20 12 G. He, C. Yang, J. Feng, J. Wu, L. Zhou, R. Wen, S. Huang, Q. Wu, F. Liu, H. Chen, T. Hang, X.  
21 Xie, *Adv. Funct. Mater.*, 2019, **29**, 1806484.
